# Supplementary material for: Structural and Computational Characterization of Disease-Related Mutations Involved in Protein-Protein Interfaces
Source: MDPI journal article supplement (doi:10.3390/ijms20071583), 2019-03-29
Supplement: s1 [file s1]

**Table S2.** Structural data on analysed proteins and their interacting partners: location of mutations in protein-protein interfaces

|                              |                      | Individual           |                         |                             |                              | Complex          | Neutral mutations <sup>7</sup> |          | Disease mutations <sup>7</sup> |           |
|------------------------------|----------------------|----------------------|-------------------------|-----------------------------|------------------------------|------------------|--------------------------------|----------|--------------------------------|-----------|
| Gene <sup>1</sup>            | UniProt <sup>1</sup> | PDB <sup>2</sup>     | Glob. Cov. <sup>3</sup> | Domain Cov. <sup>4</sup>    | Biological Unit <sup>5</sup> | PDB <sup>6</sup> | CORE                           | RIM      | CORE                           | RIM       |
| <b>ABCD4</b>                 | <b>O14678</b>        | (2hyd_A)             | 96                      | 98/100                      | Homo 2-mer                   | -                | -                              | -        | -                              | -         |
| HSPB2                        | Q16082               | (3j07_A)             | 95                      | 100                         | Homo 24-mer                  | -                | -                              | -        | -                              | -         |
| PEA15                        | Q15121               | 1n3k_A               | 100                     | 100                         | Monomer                      | -                | -                              | -        | -                              | -         |
| XRCC6                        | P12956               | 1jeq_A               | 90                      | 100/78/97/100               | Hetero 2-mer                 | -                | -                              | -        | -                              | -         |
| SARAF                        | Q96BY9               | -                    | -                       | -                           | -                            | -                | -                              | -        | -                              | -         |
| DLEU1                        | O43261               | -                    | -                       | -                           | -                            | -                | -                              | -        | -                              | -         |
| <i>All PPIs</i> <sup>8</sup> |                      |                      |                         |                             |                              |                  | -                              | -        | -                              | -         |
| <b>ACADM</b>                 | <b>P11310</b>        | 4p13_A               | 92                      | 100/100/100/100             | Homo 4-mer                   | 4p13             | 1                              | 3        | 9                              | 11        |
| USP50                        | Q70EL3               | (2hd5_A)             | 88                      | 100/100                     | Monomer                      | -                | -                              | -        | -                              | -         |
| ETFB                         | P38117               | 1efv_B               | 99                      | 100                         | Hetero 2-mer                 | 2a1t             | 0                              | 0        | 3                              | 2         |
| ETFA                         | P13804               | 1efv_A               | 94                      | 100/100                     | Hetero 2-mer                 | 2a1t             | 0                              | 0        | 1                              | 4         |
| USP20                        | Q9Y2K6               | 5z4i_A               | 11                      | 0/0/0/100                   | Monomer                      | -                | -                              | -        | -                              | -         |
| <i>All PPIs</i> <sup>8</sup> |                      |                      |                         |                             |                              |                  | <b>0</b>                       | <b>3</b> | <b>10</b>                      | <b>12</b> |
| <b>ACADS</b>                 | <b>P16219</b>        | 2vig_E               | 92                      | 100/100/100/100             | Homo 4-mer                   | 2vig             | 2                              | 0        | 8                              | 3         |
| IRF7                         | Q92985               | 2o6l_A               | 65                      | 100/59                      | Homo 2-mer                   | -                | -                              | -        | -                              | -         |
| <i>All PPIs</i> <sup>8</sup> |                      |                      |                         |                             |                              |                  | <b>2</b>                       | <b>0</b> | <b>8</b>                       | <b>1</b>  |
| <b>ACADSB</b>                | <b>P45954</b>        | 2jif_A               | 88                      | 100/100/100/100             | Homo 4-mer                   | 2jif             | 1                              | 2        | 1                              | 1         |
| USP19                        | O94966               | 1wh0_A               | 10                      | 100/0/0/0/15                | Monomer                      | -                | -                              | -        | -                              | -         |
| <i>All PPIs</i> <sup>8</sup> |                      |                      |                         |                             |                              |                  | <b>1</b>                       | <b>1</b> | <b>1</b>                       | <b>1</b>  |
| <b>ACADVL</b>                | <b>P49748</b>        | 2uxw_A               | 87                      | 100/100/100/100             | Homo 2-mer                   | 2uxw             | 5                              | 8        | 13                             | 7         |
| SOCS3                        | O14543               | (2c9w_A)             | 85                      | 100                         | Monomer                      | -                | -                              | -        | -                              | -         |
| <i>All PPIs</i> <sup>8</sup> |                      |                      |                         |                             |                              |                  | <b>5</b>                       | <b>8</b> | <b>13</b>                      | <b>7</b>  |
| <b>ACAT1</b>                 | <b>P24752</b>        | 2ib8_D               | 92                      | 100/100/100                 | Homo 4-mer                   | 2ib8             | 0                              | 2        | 2                              | 2         |
| PEX7                         | O00628               | (3w15_A)             | 93                      | 93                          | Hetero 3-mer                 | -                | -                              | -        | -                              | -         |
| EIF1B                        | O60739               | (2if1_A)             | 100                     | 100                         | Monomer                      | -                | -                              | -        | -                              | -         |
| MPG                          | P29372               | 1f6o_A               | 71                      | 97                          | Monomer                      | -                | -                              | -        | -                              | -         |
| HLA-C                        | P30504               | 1im9_E               | 75                      | 0/100/100                   | Hetero 5-mer                 | -                | -                              | -        | -                              | -         |
| GH1                          | P01241               | 1hwh_A               | 85                      | 88                          | Hetero 2-mer                 | -                | -                              | -        | -                              | -         |
| TNIK                         | Q9UKE5               | 5d7a_A               | 21                      | 96/96/0                     | Monomer                      | -                | -                              | -        | -                              | -         |
| HLA-B                        | P30480               | 4u1m_A               | 76                      | 0/100/100                   | Hetero 2-mer                 | -                | -                              | -        | -                              | -         |
| MCC                          | P23508               | -                    | -                       | -                           | -                            | -                | -                              | -        | -                              | -         |
| <i>All PPIs</i> <sup>8</sup> |                      |                      |                         |                             |                              |                  | <b>0</b>                       | <b>2</b> | <b>1</b>                       | <b>2</b>  |
| <b>ACSF3</b>                 | <b>Q4G176</b>        | (3nyq_A)             | 89                      | 100/93                      | Monomer                      | N/A              |                                |          |                                |           |
| MATN4                        | O95460               | (1ck4_A)<br>(1mjn_A) | 30                      | 0/0/100/100/100/100/0/0/0/0 | Monomer                      | -                | -                              | -        | -                              | -         |
| TRIM27                       | P14373               | (4cg4_A)<br>(2cvs_A) | 71                      | 0/100/100/0/100/0           | Homo 2-mer                   | -                | -                              | -        | -                              | -         |
| PPP1R13B                     | Q96KQ4               | (1ycs_B)             | 18                      | 100/100/100/100/100/100     | Monomer                      | -                | -                              | -        | -                              | -         |
| KRT40                        | Q6A162               | -                    | -                       | -                           | -                            | -                | -                              | -        | -                              | -         |
| <b>ARG1</b>                  | <b>P05089</b>        | 3gmz_A               | 98                      | 100                         | Homo 3-mer                   | 2aeb             | 0                              | 2        | 2                              | 0         |
| FLOT1                        | O75955               | (1win_A)             | 32                      | 77/0                        | Monomer                      | -                | -                              | -        | -                              | -         |
| USP53                        | Q70EK8               | -                    | -                       | -                           | -                            | -                | -                              | -        | -                              | -         |
| <i>All PPIs</i> <sup>8</sup> |                      |                      |                         |                             |                              |                  | <b>0</b>                       | <b>2</b> | <b>2</b>                       | <b>0</b>  |

|                             |               |                            |     |                                               |                          |      |           |           |           |          |
|-----------------------------|---------------|----------------------------|-----|-----------------------------------------------|--------------------------|------|-----------|-----------|-----------|----------|
| <b>ASL</b>                  | <b>P04424</b> | 1k62_B                     | 99  | 100/100                                       | Homo 4-mer               | 1k62 | 6         | 8         | 26        | 12       |
| HMOX1                       | P09601        | (1wov_A)                   | 81  | 100                                           | Homo 2-mer               | -    | -         | -         | -         | -        |
| TRIM3                       | O75382        | (1jm7_A)                   | 10  | 0/0/0/0/100/<br>0/0/100/100/1<br>00/100/100/0 | Homo 2-mer               | -    | -         | -         | -         | -        |
| WDYHV1                      | Q96HA8        | 4w79_A                     | 98  | 100                                           | Monomer                  | -    | -         | -         | -         | -        |
| MCMBP                       | Q9BTE3        | 4kg9_B                     | 1   | 1                                             | Monomer                  | -    | -         | -         | -         | -        |
| USP53                       | Q70EK8        | -                          | -   | -                                             | -                        | -    | -         | -         | -         | -        |
| <b>All PPIs<sup>8</sup></b> |               |                            |     |                                               |                          |      | <b>6</b>  | <b>7</b>  | <b>26</b> | <b>5</b> |
| <b>ASS1</b>                 | <b>P00966</b> | 2nz2_A                     | 98  | 99                                            | Homo 4-mer               | 2nz2 | 11        | 12        | 13        | 6        |
| ARAF                        | P10398        | (3lb7_A)<br>(1faq_A)       | 45  | 100/100/100/<br>100/0                         | Homo 2-mer<br>Monomer    | -    | -         | -         | -         | -        |
| PTPN1                       | P18031        | (1lar_A)                   | 82  | 100                                           | Monomer                  | -    | -         | -         | -         | -        |
| TERF2                       | Q15554        | 3bu8_B                     | 38  | 0/100/0                                       | Homo 4-mer               | -    | -         | -         | -         | -        |
| USP4                        | Q13107        | 2y6e_B<br>(3jyu_A)         | 35  | 100/52/81/100                                 | Homo 6-mer<br>Homo 2-mer | -    | -         | -         | -         | -        |
| TERF1                       | P54274        | 3bqo_A<br>lity_A           | 46  | 100/97                                        | Homo 2-mer<br>Monomer    | -    | -         | -         | -         | -        |
| MLH1                        | P40692        | (3na3_A)<br>3rbn_A         | 44  | 100/100/100/<br>94                            | Homo 2-mer               | -    | -         | -         | -         | -        |
| ASCC2                       | Q9H1I8        | 2di0_A                     | 9   | 100                                           | Monomer                  | -    | -         | -         | -         | -        |
| JAK2                        | O60674        | 4gmy_A<br>4z32_A<br>4fvr_A | 39  | 100/100/100/<br>100/100                       | Monomer                  | -    | -         | -         | -         | -        |
| CDR2                        | Q01850        | -                          | -   | -                                             | -                        | -    | -         | -         | -         | -        |
| AKTIP                       | Q9H8T0        | -                          | -   | -                                             | -                        | -    | -         | -         | -         | -        |
| <b>All PPIs<sup>8</sup></b> |               |                            |     |                                               |                          |      | <b>11</b> | <b>12</b> | <b>13</b> | <b>3</b> |
| <b>BCKDHA</b>               | <b>P12694</b> | 1olx_A                     | 88  | 98                                            | Hetero 4-mer             | 2bfd | 1         | 1         | 3         | 3        |
| BCKDHB                      | P21953        | 2bev_B                     | 86  | 100/100                                       | Hetero 4-mer             | 2bfd | 1         | 1         | 6         | 3        |
| BCKDK                       | O14874        | (1gkz_A)                   | 83  | 100/100                                       | Monomer                  | -    | -         | -         | -         | -        |
| <b>All PPIs<sup>8</sup></b> |               |                            |     |                                               |                          |      | <b>2</b>  | <b>2</b>  | <b>9</b>  | <b>3</b> |
| <b>BCKDHB</b>               | <b>P21953</b> | 2bev_B                     | 86  | 100/100                                       | Hetero 4-mer             | 2bfd | 0         | 0         | 6         | 2        |
| BCKDHA                      | P12694        | 1olx_A                     | 88  | 98                                            | Hetero 4-mer             | 2bfd | 0         | 0         | 9         | 2        |
| <b>All PPIs<sup>8</sup></b> |               |                            |     |                                               |                          |      | <b>0</b>  | <b>0</b>  | <b>14</b> | <b>1</b> |
| <b>BTD</b>                  | <b>P43251</b> | (4cyf_A)                   | 90  | 100                                           | Monomer                  | N/A  |           |           |           |          |
| <b>CBS</b>                  | <b>P35520</b> | 4l3v_A                     | 90  | 100/100                                       | Homo 2-mer               | 4l28 | 1         | 5         | 6         | 5        |
| PRKAR1A                     | P10644        | (4din_B)                   | 96  | 100/100/100                                   | Monomer                  | -    | -         | -         | -         | -        |
| PIAS1                       | O75925        | (4mvt_A)                   | 43  | 100/100                                       | Monomer                  | -    | -         | -         | -         | -        |
| EHHADH                      | Q08426        | (3zwc_A)                   | 100 | 100/100/100/<br>100/100                       | Monomer                  | -    | -         | -         | -         | -        |
| UBASH3A                     | P57075        | (3d4i_A)<br>(1gri_A)       | 42  | 100/100                                       | Homo 2-mer               | -    | -         | -         | -         | -        |
| FXR2                        | P51116        | (4qw2_A)<br>(2qnd_A)       | 29  | 100/0/4/100                                   | Homo 2-mer               | -    | -         | -         | -         | -        |
| CBX4                        | O00257        | 2k28_A                     | 11  | 0/100                                         | Monomer                  | -    | -         | -         | -         | -        |
| PRKAG1                      | P54619        | 5ezv_E                     | 91  | 100/100/100                                   | Hetero 3-mer             | -    | -         | -         | -         | -        |
| ZDHHC17                     | Q8IUH5        | 3eu9_A                     | 34  | 100/0/100/100/<br>/100/100/100/<br>100/100    | Homo 6-mer               | -    | -         | -         | -         | -        |
| WDYHV1                      | Q96HA8        | 4w79_A                     | 98  | 100                                           | Monomer                  | -    | -         | -         | -         | -        |
| PSMA1                       | P25786        | 4r3o_F                     | 90  | 100/100                                       | Hetero 28-mer            | -    | -         | -         | -         | -        |
| PIAS3                       | Q9Y6X2        | 4mvt_A                     | 41  | 100/82                                        | Monomer                  | -    | -         | -         | -         | -        |
| UGP2                        | Q16851        | 3r2w_D                     | 92  | 95                                            | Homo 8-mer               | -    | -         | -         | -         | -        |
| VT A1                       | Q9NP79        | 2lxm_A                     | 53  | 100                                           | Hetero 2-mer             | -    | -         | -         | -         | -        |
| RANBP9                      | Q96S59        | 5jiu_B                     | 29  | 100/0/0                                       | Homo 2-mer               | -    | -         | -         | -         | -        |
| COL4A3BP                    | Q9Y5P4        | 2e3p_A<br>4hhv_A           | 38  | 100/100/100                                   | Homo 2-mer               | -    | -         | -         | -         | -        |
| PIN1                        | Q13526        | 1nmv_A                     | 100 | 100/100/100                                   | Monomer                  | -    | -         | -         | -         | -        |
| HID1                        | Q8IV36        | -                          | -   | -                                             | -                        | -    | -         | -         | -         | -        |
| <b>All PPIs<sup>8</sup></b> |               |                            |     |                                               |                          |      | <b>1</b>  | <b>5</b>  | <b>6</b>  | <b>4</b> |

|                              |               |                                                                                |     |                                                                                                         |                         |      |          |          |           |           |
|------------------------------|---------------|--------------------------------------------------------------------------------|-----|---------------------------------------------------------------------------------------------------------|-------------------------|------|----------|----------|-----------|-----------|
| <b>CFTR</b>                  | <b>P13569</b> | 5uak_A                                                                         | 77  | 100/91/6/100                                                                                            | Homo 5-mer<br>Monomer   | 1xmi | 4        | 5        | 26        | 30        |
| LPAR2                        | Q9HBW0        | (4z35_A)                                                                       | 87  | 100/100                                                                                                 | Monomer                 | -    | -        | -        | -         | -         |
| CANX                         | P27824        | (1jhn_A)                                                                       | 67  | 0/100                                                                                                   | Monomer                 | -    | -        | -        | -         | -         |
| DERL1                        | Q9BUN8        | 5glf_B                                                                         | 5   | 0                                                                                                       | Homo 4-mer              | -    | -        | -        | -         | -         |
| BCAP31                       | P51572        | 4jzl_C                                                                         | 25  | 24                                                                                                      | Homo 2-mer              | -    | -        | -        | -         | -         |
| SLC9A3R1                     | O14745        | 2krq_A<br>2m0u_A                                                               | 60  | 100/100/100/<br>100/100                                                                                 | Monomer                 | -    | -        | -        | -         | -         |
| FLNA                         | P21333        | (4b7l_A)<br>1wlh_A<br>2j3s_A<br>2k3t_A<br>4m9p_A<br>2k7p_A<br>3rgh_A<br>3cnk_A | 13  | 100/3/100/<br>100/100/0/0/0/<br>0/100/0/100/<br>100/100/100/<br>100/0/100/100/<br>/0/100/95/100/<br>100 | Monomer<br>Homo 2-mer   | -    | -        | -        | -         | -         |
| PPP2R1A                      | P30153        | 1b3u_B                                                                         | 100 | 100/100                                                                                                 | Monomer                 | -    | -        | -        | -         | -         |
| YWHAZ                        | P63104        | 4zdr_A                                                                         | 96  | 99                                                                                                      | Homo 2-mer              | -    | -        | -        | -         | -         |
| GOPC                         | Q9HD26        | 4q6h_A                                                                         | 19  | 100                                                                                                     | Monomer                 | -    | -        | -        | -         | -         |
| PRKAG1                       | P54619        | 5ezv_E                                                                         | 91  | 100/100/100                                                                                             | Hetero 3-mer            | -    | -        | -        | -         | -         |
| GORASP2                      | Q9H8Y8        | 4edj_A                                                                         | 45  | 100/100                                                                                                 | Monomer                 | -    | -        | -        | -         | -         |
| PDZD3                        | Q86UT5        | 2v90_A                                                                         | 17  | 0/0/100/0/0                                                                                             | Homo 6-mer              | -    | -        | -        | -         | -         |
| YWHAG                        | P61981        | 4j6s_B                                                                         | 97  | 100                                                                                                     | Monomer                 | -    | -        | -        | -         | -         |
| CFTR                         | P13569        | 5uak_A                                                                         | 77  | 100/91/6/100                                                                                            | Monomer<br>Homo 5-mer   | -    | -        | -        | -         | -         |
| KCNN4                        | O15554        | -                                                                              | -   | -                                                                                                       | -                       | -    | -        | -        | -         | -         |
| KRT8                         | P05787        | -                                                                              | -   | -                                                                                                       | -                       | -    | -        | -        | -         | -         |
| ANO1                         | Q5XXA6        | -                                                                              | -   | -                                                                                                       | -                       | -    | -        | -        | -         | -         |
| SLC26A8                      | Q96RN1        | -                                                                              | -   | -                                                                                                       | -                       | -    | -        | -        | -         | -         |
| RNF5                         | Q99942        | -                                                                              | -   | -                                                                                                       | -                       | -    | -        | -        | -         | -         |
| DERL1                        | Q9BUN8        | -                                                                              | -   | -                                                                                                       | -                       | -    | -        | -        | -         | -         |
| <i>All PPIs</i> <sup>8</sup> |               |                                                                                |     |                                                                                                         |                         |      | <b>1</b> | <b>3</b> | <b>21</b> | <b>16</b> |
| <b>CPT1A</b>                 | <b>P50416</b> | (2fy5_A)                                                                       | 77  | 100/0                                                                                                   | Monomer                 | N/A  |          |          |           |           |
| CLIC1                        | O00299        | 3uvh_A                                                                         | 96  | 92/100/100                                                                                              | Homo 2-mer              | -    | -        | -        | -         | -         |
| CACYBP                       | Q9HB71        | 1x5m_A<br>2jtt_C<br>(1ysm_A)                                                   | 56  | 69/100/55                                                                                               | Monomer                 | -    | -        | -        | -         | -         |
| KBTBD7                       | Q8WVZ9        | -                                                                              | -   | -                                                                                                       | -                       | -    | -        | -        | -         | -         |
| <b>CPT1B</b>                 | <b>Q92523</b> | (1nm8_A)                                                                       | 77  | 0/100                                                                                                   | Monomer                 | N/A  |          |          |           |           |
| TEX44                        | Q53QW1        | -                                                                              | -   | -                                                                                                       | -                       | -    | -        | -        | -         | -         |
| <b>CPT1C</b>                 | <b>Q8TCG5</b> | 2m76_A                                                                         | 6   | 100/0                                                                                                   | Monomer                 | N/A  |          |          |           |           |
| <b>CPT2</b>                  | <b>P23786</b> | (2deb_A)                                                                       | 95  | 100                                                                                                     | Monomer                 | N/A  |          |          |           |           |
| <b>CYP11B1</b>               | <b>P15538</b> | (4dvq_A)                                                                       | 93  | 100                                                                                                     | Homo 6-mer              | -    | -        | -        | -         | -         |
| <b>CYP17A1</b>               | <b>P05093</b> | 5irv_C                                                                         | 93  | 100                                                                                                     | Monomer                 | N/A  |          |          |           |           |
| CDH1                         | P12830        | (3q2v_A)<br>(1op4_A)                                                           | 61  | 100/0/100/100/<br>/100/100/100                                                                          | Monomer                 | -    | -        | -        | -         | -         |
| TIGD7                        | Q6NT04        | (1hlv_A)                                                                       | 24  | 100/88/0                                                                                                | Monomer                 | -    | -        | -        | -         | -         |
| APC                          | P25054        | 3nmz_A<br>1deb_B<br>1m5i_A<br>1th1_C<br>1emu_B<br>2rqu_B                       | 14  | 0/0/0/0/0/0/0/<br>0/0/100/0/100/<br>2/0/0/50/76/93                                                      | Monomer                 | -    | -        | -        | -         | -         |
| PTPRJ                        | Q12913        | 2nz6_A                                                                         | 22  | 93                                                                                                      | Monomer                 | -    | -        | -        | -         | -         |
| IGF1R                        | P08069        | 1igr_A<br>1p4o_B                                                               | 34  | 100/100/100/<br>100/100                                                                                 | Monomer                 | -    | -        | -        | -         | -         |
| CDO1                         | Q16878        | 2ic1_A                                                                         | 92  | 97                                                                                                      | Monomer                 | -    | -        | -        | -         | -         |
| CHEK2                        | O96017        | 3i6u_A                                                                         | 72  | 91/100/91/91                                                                                            | Homo 2-mer              | -    | -        | -        | -         | -         |
| HSP90AB1                     | P08238        | 5fwk_B                                                                         | 87  | 100/100/87                                                                                              | Monomer<br>Hetero 4-mer | -    | -        | -        | -         | -         |
| BARX1                        | Q9HBU1        | 2dmt_A                                                                         | 31  | 100                                                                                                     | Monomer                 | -    | -        | -        | -         | -         |
| STK11                        | Q15831        | 2wtk_C                                                                         | 66  | 99/100/99                                                                                               | Monomer<br>Hetero 3-mer | -    | -        | -        | -         | -         |
| ERBB2                        | P04626        | 3n85_A                                                                         | 48  | 99/100/99/92/                                                                                           | Hetero 9-mer            | -    | -        | -        | -         | -         |

|                             |               |                              |     |                                     |                        |      |           |           |          |          |
|-----------------------------|---------------|------------------------------|-----|-------------------------------------|------------------------|------|-----------|-----------|----------|----------|
|                             |               | 3pp0_B                       |     | 100/97                              | Monomer                |      |           |           |          |          |
| ATP5E                       | P56381        | (2v7q_I)                     | 92  | 96                                  | Homo 3-mer             | -    | -         | -         | -        | -        |
| RPAIN                       | Q86UA6        | -                            | -   | -                                   | -                      | -    | -         | -         | -        | -        |
| <b>CYP21A2</b>              | <b>P08686</b> | 4y8w_C                       | 89  | 96                                  | Monomer                | N/A  |           |           |          |          |
| <b>DBT</b>                  | <b>P11182</b> | (2ii3_A)<br>2coo_A<br>1k8m_A | 48  | 100/100/100                         | Homo 24-mer<br>Monomer | -    | -         | -         | -        | -        |
| DLD                         | P09622        | 1zmd_A                       | 93  | 100/100/100/<br>100/100/100/<br>100 | Homo 2-mer             | -    | -         | -         | -        | -        |
| USP16                       | Q9Y5T5        | 2i50_A                       | 15  | 100/0/0                             | Monomer                | -    | -         | -         | -        | -        |
| ADI1                        | Q9BV57        | 4qgn_A                       | 99  | 100/100                             | Monomer                | -    | -         | -         | -        | -        |
| <b>ETFA</b>                 | <b>P13804</b> | 1efv_A                       | 94  | 100/100                             | Hetero 2-mer           | N/A  |           |           |          |          |
| ETFB                        | P38117        | 1efv_B                       | 99  | 100                                 | Hetero 2-mer           | 1efv | 5         | 6         | 2        | 1        |
| ACADM                       | P11310        | 4p13_A                       | 92  | 100/100/100/<br>100                 | Homo 4-mer             | 2a1t | 0         | 0         | 0        | 2        |
| HSPB2                       | Q16082        | (3j07_A)                     | 94  | 100                                 | Homo 24-mer            | -    | -         | -         | -        | -        |
| IKBKE                       | Q14164        | (4im0_A)                     | 90  | 100/100                             | Homo 2-mer             | -    | -         | -         | -        | -        |
| FTSJ1                       | Q9UET6        | (1ej0_A)                     | 55  | 100                                 | Monomer                | -    | -         | -         | -        | -        |
| EIF1B                       | O60739        | (2if1_A)                     | 100 | 100                                 | Monomer                | -    | -         | -         | -        | -        |
| ELF3                        | P78545        | 3jtg_A<br>2e8p_A             | 25  | 100/100                             | Monomer                | -    | -         | -         | -        | -        |
| TRAF6                       | Q9Y4K3        | 3hcs_A                       | 30  | 12/100/100/<br>100/100/100/<br>100/ | Homo 2-mer             | -    | -         | -         | -        | -        |
| CDC42                       | P60953        | 5c2j_B                       | 100 | 100/100/100                         | Hetero 2-mer           | -    | -         | -         | -        | -        |
| PSEN1                       | P49768        | 5fn5_B                       | 48  | 54                                  | Monomer                | -    | -         | -         | -        | -        |
| MPG                         | P29372        | 1f6o_A                       | 71  | 97                                  | Monomer                | -    | -         | -         | -        | -        |
| PRKAB1                      | Q9Y478        | 5ezv_D                       | 69  | 100/100                             | Hetero 3-mer           | -    | -         | -         | -        | -        |
| MCC                         | P23508        | -                            | -   | -                                   | -                      | -    | -         | -         | -        | -        |
| <b>All PPIs<sup>8</sup></b> |               |                              |     |                                     |                        |      | <b>5</b>  | <b>6</b>  | <b>2</b> | <b>1</b> |
| <b>ETFB</b>                 | <b>P38117</b> | 1efv_B                       | 99  | 100                                 | Hetero 2-mer           | N/A  |           |           |          |          |
| ETFA                        | P13804        | 1efv_A                       | 94  | 100/100                             | Hetero 2-mer           | 1efv | 12        | 10        | 1        | 0        |
| ACADM                       | P11310        | 4p13_A                       | 92  | 100/100/100/<br>100                 | Homo 4-mer             | 2a1t | 0         | 2         | 0        | 1        |
| IKBKE                       | Q14164        | (4im0_A)                     | 90  | 100/100                             | Homo 2-mer             | -    | -         | -         | -        | -        |
| <b>All PPIs<sup>8</sup></b> |               |                              |     |                                     |                        |      | <b>11</b> | <b>11</b> | <b>1</b> | <b>3</b> |
| <b>ETFDH</b>                | <b>Q16134</b> | (2gmh_A)                     | 94  | 100/100/100                         | Homo 2-mer             | -    | -         | -         | -        | -        |
| ZNF581                      | Q9P0T4        | (1ubd_C)                     | 53  | 100/100                             | Monomer                | -    | -         | -         | -        | -        |
| MYH7B                       | A7E2Y1        | (4p7h_B)                     | 40  | 0/100/100                           | Monomer                | -    | -         | -         | -        | -        |
| KRTAP13-2                   | Q52LG2        | -                            | -   | -                                   | -                      | -    | -         | -         | -        | -        |
| OTX1                        | P32242        | (2dms_A)                     | 21  | 100/0                               | Monomer                | -    | -         | -         | -        | -        |
| KRTAR11-1                   | Q8IUC1        | -                            | -   | -                                   | -                      | -    | -         | -         | -        | -        |
| HSD17B10                    | Q99714        | 1u7t_B                       | 98  | 100/100/100                         | Homo 4-mer             | -    | -         | -         | -        | -        |
| AIRE                        | O43918        | 1xwh_A<br>2lri_C             | 12  | 100/12/0                            | Monomer                | -    | -         | -         | -        | -        |
| TRIM69                      | Q86WT6        | (2iwg_B)                     | 36  | 0/0/100/100/0/<br>0                 | Monomer                | -    | -         | -         | -        | -        |
| <b>FAH</b>                  | <b>P16930</b> | (1hyo_A)                     | 99  | 100/100                             | Homo 2-mer             | -    | -         | -         | -        | -        |
| EGFR                        | P00533        | 3qwq_A<br>3w32_A             | 51  | 100/100/100/<br>100/100/100         | Monomer<br>Homo 2-mer  | -    | -         | -         | -        | -        |
| TCF4                        | P15884        | 2kwf_B                       | 3   | 0                                   | Monomer                | -    | -         | -         | -        | -        |
| KRTAP5-9                    | P26371        | -                            | -   | -                                   | -                      | -    | -         | -         | -        | -        |
| KRTAP10-8                   | P60410        | -                            | -   | -                                   | -                      | -    | -         | -         | -        | -        |
| ADAMTSL4                    | Q6UY14        | -                            | -   | -                                   | -                      | -    | -         | -         | -        | -        |
| SERTAD1                     | Q9UHV2        | -                            | -   | -                                   | -                      | -    | -         | -         | -        | -        |
| <b>FCGR2A</b>               | <b>P12318</b> | 1h9v_A                       | 54  | 100/100/100/<br>100                 | Homo 2-mer<br>Monomer  | 1fcg | 0         | 0         | 1        | 0        |
| UBQLN1                      | Q9UMX0        | (1j8c_A)<br>2jy5_A           | 18  | 100/100/98                          | Monomer                | -    | -         | -         | -        | -        |
| APCS                        | P02743        | 4avv_A                       | 92  | 100                                 | Homo 5-mer             | 3d5o | 0         | 0         | 0        | 0        |
| IGHG1                       | P01857        | 1hzh_H                       | 100 | 100/100/100/<br>100                 | Homo 2-mer             | 3ry6 | 0         | 0         | 0        | 1        |

|                              |               |                    |     |                                                                          |                       |      |          |          |           |          |
|------------------------------|---------------|--------------------|-----|--------------------------------------------------------------------------|-----------------------|------|----------|----------|-----------|----------|
| CRP                          | P02741        | 3l2y_A             | 92  | 100/100                                                                  | Homo 5-mer            | -    | -        | -        | -         | -        |
| <b>All PPIs</b> <sup>8</sup> |               |                    |     |                                                                          |                       |      | <b>0</b> | <b>0</b> | <b>1</b>  | <b>0</b> |
| <b>GALT</b>                  | <b>P07902</b> | 5in3_B             | 87  | 91/99                                                                    | Homo 2-mer            | 5in3 | 1        | 2        | 18        | 9        |
| GRPEL1                       | Q9HAV7        | (4ani_A)           | 76  | 98                                                                       | Homo 4-mer            | -    | -        | -        | -         | -        |
| TNK2                         | Q07912        | 4hzs_D<br>1cf4_B   | 31  | 95/62/95/100/<br>0                                                       | Monomer               | -    | -        | -        | -         | -        |
| TRIP13                       | Q15645        | 5vqa_A             | 85  | 88/84/86                                                                 | Monomer               | -    | -        | -        | -         | -        |
| NQO1                         | P15559        | 1gg5_A             | 100 | 100                                                                      | Homo 2-mer            | -    | -        | -        | -         | -        |
| KRTAP6-2                     | Q3LI66        | -                  | -   | -                                                                        | -                     | -    | -        | -        | -         | -        |
| <b>All PPIs</b> <sup>8</sup> |               |                    |     |                                                                          |                       |      | <b>0</b> | <b>2</b> | <b>17</b> | <b>9</b> |
| <b>GCDH</b>                  | <b>Q92947</b> | 1siq_A             | 89  | 100/100/100                                                              | Homo 4-mer            | 1siq | 9        | 11       | 19        | 7        |
| NOS3                         | P29474        | (1tl_A)<br>5uoc_A  | 55  | 100/100/99<br>/100                                                       | Homo 2-mer            | -    | -        | -        | -         | -        |
| RNF32                        | Q9H0A6        | (1iy_m_A)          | 12  | 100/96/100/<br>100/96/100/<br>100/0/100/0                                | Monomer               | -    | -        | -        | -         | -        |
| APOE                         | P02649        | 2l7b_A             | 95  | 100                                                                      | Monomer               | -    | -        | -        | -         | -        |
| CDC37                        | Q16543        | 5fwp_E<br>2n5x_A   | 68  | 99/88/100                                                                | Monomer               | -    | -        | -        | -         | -        |
| PSEN1                        | P49768        | 5fn5_B             | 48  | 54                                                                       | Monomer<br>Homo 2-mer | -    | -        | -        | -         | -        |
| GRB2                         | P62993        | 1gri_A             | 97  | 88/100/97/<br>100/100/100                                                | Homo 2-mer            | -    | -        | -        | -         | -        |
| A2M                          | P01023        | 4acq_C             | 95  | 96/100/100/<br>100/100/100                                               | Homo 4-mer            | -    | -        | -        | -         | -        |
| EXOC6                        | Q8TAG9        | (2a2f_X)           | 40  | 90                                                                       | Monomer               | -    | -        | -        | -         | -        |
| ECSIT                        | Q9BQ95        | -                  | -   | -                                                                        | -                     | -    | -        | -        | -         | -        |
| <b>All PPIs</b> <sup>8</sup> |               |                    |     |                                                                          |                       |      | <b>9</b> | <b>9</b> | <b>18</b> | <b>4</b> |
| <b>HADHA</b>                 | <b>P40939</b> | (2wtb_A)           | 94  | 100/100/100/100                                                          | Monomer               | N/A  |          |          |           |          |
| IKBKE                        | Q14164        | (4im0_A)           | 90  | 100/100                                                                  | Homo 2-mer            | -    | -        | -        | -         | -        |
| TRAF6                        | Q9Y4K3        | 3hcs_A             | 30  | 12/100/100/<br>100/100/100<br>/100/                                      | Homo 2-mer            | -    | -        | -        | -         | -        |
| PRKAB1                       | Q9Y478        | 5ezv_D             | 69  | 100/100                                                                  | Hetero 3-mer          | -    | -        | -        | -         | -        |
| GABARAP                      | O95166        | 1kot_A             | 100 | 100/100                                                                  | Monomer               | -    | -        | -        | -         | -        |
| BCAR3                        | O75815        | 3t6a_C             | 37  | 0/100                                                                    | Monomer               | -    | -        | -        | -         | -        |
| GABARAPL1                    | Q9H0R8        | 5lxi_B             | 100 | 100/100                                                                  | Homo 2-mer            | -    | -        | -        | -         | -        |
| HSD17B10                     | Q99714        | 1u7t_B             | 98  | 100/100/100                                                              | Homo 4-mer            | -    | -        | -        | -         | -        |
| EPB41                        | P11171        | 1gg3_C             | 32  | 100/100/0/96/<br>0/0                                                     | Monomer               | -    | -        | -        | -         | -        |
| HLA-B                        | P30480        | 4ulm_A             | 76  | 0/100/100                                                                | Monomer               | -    | -        | -        | -         | -        |
| MAP1LC3B                     | Q9GZQ8        | 2zjd_C             | 98  | 100/100                                                                  | Monomer               | -    | -        | -        | -         | -        |
| GABARAPL2                    | P60520        | 4co7_B             | 100 | 100/100                                                                  | Monomer               | -    | -        | -        | -         | -        |
| USP49                        | Q70CQ1        | -                  | -   | -                                                                        | -                     | -    | -        | -        | -         | -        |
| <b>HADHB</b>                 | <b>P55084</b> | (2iik_A)           | 89  | 100/100/100                                                              | Homo 2-mer            | -    | -        | -        | -         | -        |
| HSPB2                        | Q16082        | (3j07_A)           | 94  | 100                                                                      | Homo 24-mer           | -    | -        | -        | -         | -        |
| SMN1                         | Q16637        | -                  | -   | -                                                                        | -                     | -    | -        | -        | -         | -        |
| ANXA7                        | P20073        | (1dm5_A)           | 64  | 100/100/100                                                              | Homo 6-mer            | -    | -        | -        | -         | -        |
| TNNI3K                       | Q59H18        | (1n11_A)<br>4yfi_C | 42  | 93/100/100/0/<br>100/100/100/<br>100/100/100/<br>100/100/100/<br>100/100 | Monomer<br>Homo 2-mer | -    | -        | -        | -         | -        |
| DUX1                         | O43812        | (1fjl_A)           | 36  | 0/100                                                                    | Homo 2-mer            | -    | -        | -        | -         | -        |
| TK1                          | P04183        | 1w4r_A             | 74  | 100                                                                      | Homo 4-mer            | -    | -        | -        | -         | -        |
| RCC1                         | P18754        | 1a12_C             | 95  | 100/100/100/1<br>00/100/100/10<br>0/100                                  | Homo 3-mer            | -    | -        | -        | -         | -        |
| CDKN1A                       | P38936        | 4rjf_B             | 12  | 0                                                                        | Hetero 6-mer          | -    | -        | -        | -         | -        |
| GABARAPL1                    | Q9H0R8        | 5lxi_B             | 100 | 100/100                                                                  | Homo 2-mer            | -    | -        | -        | -         | -        |
| HSD17B10                     | Q99714        | 1u7t_B             | 98  | 100/100/100                                                              | Homo 4-mer            | -    | -        | -        | -         | -        |
| MAP1LC3C                     | Q9BXW4        | 2ncn_A             | 86  | 100                                                                      | Monomer               | -    | -        | -        | -         | -        |



|                              |               |                    |    |                                             |                          |               |          |          |          |          |
|------------------------------|---------------|--------------------|----|---------------------------------------------|--------------------------|---------------|----------|----------|----------|----------|
| CREBZF                       | Q9NS37        | -                  | -  | -                                           | -                        | -             | -        | -        | -        | -        |
| CREB3                        | O43889        | -                  | -  | -                                           | -                        | -             | -        | -        | -        | -        |
| TET3                         | O43151        | -                  | -  | -                                           | -                        | -             | -        | -        | -        | -        |
| <i>All PPIs</i> <sup>8</sup> |               |                    |    |                                             |                          |               | <b>5</b> | <b>2</b> | <b>1</b> | <b>0</b> |
| <b>HMGCL</b>                 | <b>P35914</b> | 2cw6_A             | 91 | 100                                         | Homo 2-mer               | 2cw6          | 0        | 1        | 0        | 0        |
| RNF126                       | Q9BV68        | (1x4j_A)<br>2n9p_A | 21 | 100/100/100/<br>100/100/100/<br>100/100/100 | Monomer                  | -             | -        | -        | -        | -        |
| ADAMTS10                     | Q9H324        | (1lsl_A)           | 10 | 0                                           | Monomer                  | -             | -        | -        | -        | -        |
| DNAJA1                       | P31689        | 2lo1_A<br>(1nlt_A) | 58 | 100/100/100                                 | Monomer                  | -             | -        | -        | -        | -        |
| HSD17B10                     | Q99714        | 1u7t_A             | 98 | 100/100/100                                 | Homo 4-mer               | -             | -        | -        | -        | -        |
| HES1                         | Q14469        | 2mh3_A             | 25 | 0/100                                       | Homo 2-mer               | -             | -        | -        | -        | -        |
| GTF2B                        | Q00403        | 5iyb_M             | 98 | 100/100/100/<br>100                         | Monomer<br>Hetero 21-mer | -             | -        | -        | -        | -        |
| ARL6IP1                      | Q15041        | -                  | -  | -                                           | -                        | -             | -        | -        | -        | -        |
| MS4A7                        | Q9GZW8        | -                  | -  | -                                           | -                        | -             | -        | -        | -        | -        |
| <i>All PPIs</i> <sup>8</sup> |               |                    |    |                                             |                          |               | <b>0</b> | <b>1</b> | <b>0</b> | <b>0</b> |
| <b>HPD</b>                   | <b>P32754</b> | 3isq_A             | 96 | 100/100/100                                 | Homo 2-mer               | 3isq          | 1        | 5        | 1        | 0        |
| CDKN1A                       | P38936        | 4rjf_B             | 12 | 0                                           | Monomer<br>Hetero 6-mer  | -             | -        | -        | -        | -        |
| IKBKG                        | Q9Y6K9        | 4bwn_A<br>3brt_D   | 20 | 98/92                                       | Homo 2-mer               | -             | -        | -        | -        | -        |
| <i>All PPIs</i>              |               |                    |    |                                             |                          |               | <b>1</b> | <b>5</b> | <b>1</b> | <b>0</b> |
| <b>HSD3B2</b>                | <b>P26439</b> | (3wj7_A)           | 95 | 100                                         | Homo 3-mer               | -             | -        | -        | -        | -        |
| <b>IVD</b>                   | <b>P26440</b> | livh_A             | 91 | 100/100/100/<br>100                         | Homo 4-mer               | livh          | 1        | 2        | 5        | 3        |
| ACTN3                        | Q08043        | (4d1e_A)           | 95 | 100/100/100/<br>100/100/100/<br>100/100     | Homo 2-mer               | -             | -        | -        | -        | -        |
| GPSM3                        | Q9Y4H4        | -                  | -  | -                                           | -                        | -             | -        | -        | -        | -        |
| <i>All PPIs</i> <sup>8</sup> |               |                    |    |                                             |                          |               | <b>1</b> | <b>2</b> | <b>3</b> | <b>2</b> |
| <b>LMBRD1</b>                | <b>Q9NUN5</b> | -                  | -  | -                                           | -                        | -             | -        | -        | -        | -        |
| <b>MCCC1</b>                 | <b>Q96RQ3</b> | (3u9s_A)           | 92 | 100/100/100/100                             | Hetero 12-mer            | N/A           |          |          |          |          |
| <b>MCCC2</b>                 | <b>Q9HCC0</b> | (3u9r_B)           | 95 | 100                                         | Homo 6-mer               | -             | -        | -        | -        | -        |
| HSPB2                        | Q16082        | (3j07_A)           | 94 | 100                                         | Homo 24-mer              | -             | -        | -        | -        | -        |
| <b>MLYCD</b>                 | <b>O95822</b> | 4f0x_A             | 92 | 100/100                                     | Homo 2-mer<br>Homo 4-mer | 2ygw,<br>4f0x | 1        | 3        | 2        | 4        |
| UBALD1                       | Q8TB05        | (2dz1_A)           | 33 | 100                                         | Monomer                  | -             | -        | -        | -        | -        |
| RBM5                         | P52756        | 2lkz_A             | 12 | 0/0/100/0                                   | Monomer                  | -             | -        | -        | -        | -        |
| <i>All PPIs</i> <sup>8</sup> |               |                    |    |                                             |                          |               | <b>1</b> | <b>2</b> | <b>2</b> | <b>2</b> |
| <b>MMAA</b>                  | <b>Q8IVH4</b> | 2www_D             | 75 | 89                                          | Homo 2-mer               | 2www          | 1        | 2        | 0        | 2        |
| <i>All PPIs</i> <sup>8</sup> |               |                    |    |                                             |                          |               | <b>1</b> | <b>2</b> | <b>0</b> | <b>2</b> |
| <b>MMAB</b>                  | <b>Q96EY8</b> | 2idx_C             | 72 | 98                                          | Homo 3-mer               | 2idx          | 0        | 1        | 3        | 1        |
| SPERT                        | Q8NA61        | -                  | -  | -                                           | -                        | -             | -        | -        | -        | -        |
| <i>All PPIs</i> <sup>8</sup> |               |                    |    |                                             |                          |               | <b>0</b> | <b>1</b> | <b>2</b> | <b>1</b> |
| <b>MMACHC</b>                | <b>Q9Y4U1</b> | 3sc0_A             | 84 | 100                                         | Monomer                  | N/A           |          |          |          |          |
| MTR                          | Q99707        | 4ccz_A<br>(3bul_A) | 48 | 100/100/100/<br>92/100                      | Monomer                  | -             | -        | -        | -        | -        |
| MMADHC                       | Q9H3L0        | 5cv0_A             | 57 | 62                                          | Homo 2-mer               | -             | -        | -        | -        | -        |
| CREB5                        | Q02930        | -                  | -  | -                                           | -                        | -             | -        | -        | -        | -        |
| <b>MMADHC</b>                | <b>Q9H3L0</b> | 5cv0_A             | 57 | 62                                          | Homo 2-mer               | 5cv0          | 3        | 8        | 0        | 0        |
| MMACHC                       | Q9Y4U1        | 3sc0_A             | 84 | 100                                         | Monomer                  | -             | -        | -        | -        | -        |
| <i>All PPIs</i> <sup>8</sup> |               |                    |    |                                             |                          |               | <b>3</b> | <b>8</b> | <b>0</b> | <b>0</b> |
| <b>MTHFR</b>                 | <b>P42898</b> | (1v93_A)           | 45 | 100                                         | Monomer                  | N/A           |          |          |          |          |
| LSM8                         | O95777        | (4c92_A)           | 96 | 100                                         | Monomer<br>Hetero 7-mer  | -             | -        | -        | -        | -        |





|                             |               |                                        |    |                                                           |                          |      |          |          |          |          |
|-----------------------------|---------------|----------------------------------------|----|-----------------------------------------------------------|--------------------------|------|----------|----------|----------|----------|
| MTUS2                       | Q5JR59        | -                                      | -  | -                                                         | -                        | -    | -        | -        | -        | -        |
| NOTCH2NL                    | Q7Z3S9        | -                                      | -  | -                                                         | -                        | -    | -        | -        | -        | -        |
| KRT27                       | Q7Z3Y8        | -                                      | -  | -                                                         | -                        | -    | -        | -        | -        | -        |
| <b>SLC25A13</b>             | <b>Q9UJS0</b> | 4p5w_A                                 | 46 | 0/0/0                                                     | Homo 2-mer               | 4p5w | 1        | 9        | 4        | 3        |
| USP50                       | Q70EL3        | (2hd5_A)                               | 88 | 100/100                                                   | Monomer                  | -    | -        | -        | -        | -        |
| <b>All PPIs<sup>8</sup></b> |               |                                        |    |                                                           |                          |      | <b>1</b> | <b>9</b> | <b>4</b> | <b>3</b> |
| <b>SLC25A20</b>             | <b>O43772</b> | (1okc_A)                               | 95 | 100/100/94                                                | Monomer                  | N/A  |          |          |          |          |
| <b>TAT</b>                  | <b>P17735</b> | 3dyd_A                                 | 85 | 0/100                                                     | Homo 2-mer               | 3dyd | 2        | 1        | 0        | 1        |
| UBE3A                       | Q05086        | 1c4z_A<br>2kr1_A                       | 40 | 100/98                                                    | Monomer                  | -    | -        | -        | -        | -        |
| GLUL                        | P15104        | 2ojw_C                                 | 97 | 100/100                                                   | Homo 10-mer              | -    | -        | -        | -        | -        |
| JPT2                        | Q9H910        | (4hpo_L)                               | 97 | 100                                                       | Monomer                  | -    | -        | -        | -        | -        |
| <b>All PPIs<sup>8</sup></b> |               |                                        |    |                                                           |                          |      | <b>2</b> | <b>1</b> | <b>0</b> | <b>1</b> |
| <b>TGFB1</b>                | <b>P01137</b> | 5ffo_H                                 | 83 | 95/94                                                     | Monomer,<br>Homo 2-mer   | 5ffo | 1        | 3        | 3        | 1        |
| CDKN2A                      | Q8N726        | (2g7l_A)                               | 98 | 100                                                       | Homo 2-mer               | -    | -        | -        | -        | -        |
| KLK9                        | Q9UKQ9        | (2psx_A)                               | 91 | 100                                                       | Monomer                  | -    | -        | -        | -        | -        |
| FSTL1                       | Q12841        | (1lr7_A)                               | 22 | 100/100/100                                               | Monomer                  | -    | -        | -        | -        | -        |
| CCL5                        | P13501        | (1el0_A)                               | 80 | 100                                                       | Monomer                  | -    | -        | -        | -        | -        |
| BMPR1A                      | P36894        | (3mdy_A)<br>2k3g_A                     | 62 | 100/100/100/<br>100                                       | Monomer                  | -    | -        | -        | -        | -        |
| MMP9                        | P14780        | (1ck7_A)                               | 96 | 100/100/100/<br>100/100/100/<br>100/100                   | Monomer                  | -    | -        | -        | -        | -        |
| LCE3B                       | Q5TA77        | (3tjq_A)                               | 93 | 99                                                        | Monomer                  | -    | -        | -        | -        | -        |
| BUB1                        | O43683        | (3e7e_A)<br>2lah_A                     | 32 | 100/100/100/<br>100                                       | Monomer                  | -    | -        | -        | -        | -        |
| DIRAS3                      | O95661        | (2p67_A)                               | 95 | 100/100/100                                               | Monomer                  | -    | -        | -        | -        | -        |
| AXIN2                       | Q9Y2T1        | (1dk8_A)<br>(1wsp_A)                   | 17 | 0/100/100/11                                              | Homo 2-mer<br>Homo 3-mer | -    | -        | -        | -        | -        |
| TGFBR3                      | Q03167        | (3qw9_A)                               | 20 | 51                                                        | Homo 2-mer               | -    | -        | -        | -        | -        |
| THBS1                       | P07996        | (1yo8_A)<br>5foe_B<br>2es3_A<br>3r6b_A | 53 | 100/100/98/10<br>0/100/100/100<br>/100/100/100/<br>100/96 | Monomer                  | -    | -        | -        | -        | -        |
| THRSP                       | Q92748        | (3ont_A)                               | 94 | 95                                                        | Homo 2-mer               | -    | -        | -        | -        | -        |
| MEOX2                       | P50222        | (1puf_A)                               | 19 | 100                                                       | Monomer                  | -    | -        | -        | -        | -        |
| LAMB1                       | P07942        | (4aqs_A)                               | 26 | 100/100/72/0/<br>0/0/0/0/0/0/<br>0/100                    | Monomer                  | -    | -        | -        | -        | -        |
| PRSS50                      | Q9UI38        | (1z8g_A)                               | 86 | 100/100                                                   | Monomer                  | -    | -        | -        | -        | -        |
| HOXC6                       | P09630        | (1ftz_A)                               | 28 | 100                                                       | Monomer                  | -    | -        | -        | -        | -        |
| MTA3                        | Q9BTC8        | (4bkx_A)                               | 28 | 0/0/0/100                                                 | Monomer                  | -    | -        | -        | -        | -        |
| HOXA1                       | P49639        | (1b72_A)                               | 27 | 100                                                       | Monomer                  | -    | -        | -        | -        | -        |
| LCE3D                       | Q9BYE3        | (1m8n_A)                               | 99 | 100                                                       | Monomer                  | -    | -        | -        | -        | -        |
| NSD3                        | Q9BZ95        | (4yz8_A)<br>4rxj_A                     | 15 | 0/100/100                                                 | Homo 2-mer               | -    | -        | -        | -        | -        |
| CST6                        | Q15828        | (2ch9_A)                               | 85 | 100                                                       | Homo 2-mer               | -    | -        | -        | -        | -        |
| ERBB2                       | P04626        | 3n85_A<br>3pp0_B                       | 48 | 99/100/99/92/<br>100/97                                   | Monomer                  | -    | -        | -        | -        | -        |
| TGFBR1                      | P36897        | 3faa_E<br>2l5s_A                       | 66 | 100/100/100/<br>100                                       | Monomer                  | 3kfd | 0        | 0        | 0        | 0        |
| KLK7                        | P49862        | 2qxj_A                                 | 88 | 100                                                       | Monomer                  | -    | -        | -        | -        | -        |
| AGR3                        | Q8TD06        | 3ph9_B                                 | 81 | 100                                                       | Monomer                  | -    | -        | -        | -        | -        |
| WFIKK1                      | Q96NZ8        | 2ddi_A                                 | 13 | 0/0/0/0/0/<br>100/0/0/0                                   | Monomer                  | -    | -        | -        | -        | -        |
| LAMTOR5                     | O43504        | 3msh_A                                 | 99 | 100                                                       | Homo 2-mer               | -    | -        | -        | -        | -        |
| ITGAV                       | P06756        | 3ije_A                                 | 89 | 93/100/100                                                | Monomer,<br>Hetero 2-mer | 5ffo | 1        | 3        | 0        | 0        |
| FNTA                        | P49354        | 2h6i_A                                 | 83 | 100/100/100/<br>100/100                                   | Monomer,<br>Hetero 2-mer | -    | -        | -        | -        | -        |
| LPXN                        | O60711        | 1x3h_A<br>(1v6g_A)                     | 21 | 5/100/100/100                                             | Monomer                  | -    | -        | -        | -        | -        |

|                 |               |                                                |     |                                                  |                          |      |          |          |          |          |
|-----------------|---------------|------------------------------------------------|-----|--------------------------------------------------|--------------------------|------|----------|----------|----------|----------|
|                 |               | 1m3v_A)                                        |     |                                                  |                          |      |          |          |          |          |
| TLR2            | O60603        | 2z7x_A<br>1fyx_A                               | 70  | 98/98/100/100<br>/100/100/100                    | Monomer,<br>Hetero 2-mer | -    | -        | -        | -        | -        |
| APC             | P25054        | 3nmz_A<br>1emu_B<br>2rqu_B<br>1deb_B<br>1m5i_A | 14  | 0/0/0/0/0/0/<br>0/0/100/0/100/<br>0/0/0/50/96/93 | Monomer,<br>Hetero 4-mer | -    | -        | -        | -        | -        |
| PDLIM2          | Q96JY6        | 3pdv_A                                         | 25  | 100/0/0                                          | Monomer                  | -    | -        | -        | -        | -        |
| DAXX            | Q9UER7        | 2kzs_A                                         | 13  | 98                                               | Monomer                  | -    | -        | -        | -        | -        |
| SNAI1           | O95863        | 3w5k_B                                         | 42  | 92/100                                           | Monomer,<br>Hetero 2-mer | -    | -        | -        | -        | -        |
| FBXW7           | Q969H0        | 2ovq_B                                         | 63  | 100/100/100/<br>100/100/100                      | Monomer,<br>Hetero 2-mer | -    | -        | -        | -        | -        |
| DLC1            | Q96QB1        | 3kuq_A<br>2gky_A                               | 13  | 100/100/0                                        | Monomer                  | -    | -        | -        | -        | -        |
| FKBP1A          | P62942        | 3mdy_B                                         | 100 | 100                                              | Monomer,<br>Hetero 2-mer | -    | -        | -        | -        | -        |
| AURKA           | O14965        | 2j4z_B                                         | 67  | 100/100                                          | Monomer                  | -    | -        | -        | -        | -        |
| ST14            | Q9Y5Y6        | 4jyt_A                                         | 28  | 100/0/0/0/0/0/<br>0/0                            | Monomer                  | -    | -        | -        | -        | -        |
| EGFR            | P00533        | 3qwq_A<br>3w32_A                               | 51  | 100/100/100/<br>100/100/100                      | Monomer                  | -    | -        | -        | -        | -        |
| TGFBR2          | P37173        | 5e8y_A<br>1plo_A                               | 53  | 99/99/100                                        | Monomer                  | 3kfd | 0        | 0        | 0        | 0        |
| BCL10           | O95999        | 2mb9_A                                         | 45  | 100                                              | Monomer                  | -    | -        | -        | -        | -        |
| APP             | P05067        | 3nyl_A<br>3ktm_C<br>1aap_A<br>2roz_A<br>2lpl_A | 25  | 79/55/97/100/<br>100/100                         | Monomer                  | -    | -        | -        | -        | -        |
| ENG             | P17813        | 5hzv_A                                         | 86  | 99                                               | Monomer                  | -    | -        | -        | -        | -        |
| MMP2            | P08253        | 1gxd_A                                         | 94  | 100/100/100/<br>100/100/100/<br>100/100          | Monomer,<br>Hetero 2-mer | -    | -        | -        | -        | -        |
| ITGB6           | P18564        | 5ffo_B                                         | 87  | 100/100/100/0                                    | Monomer                  | 5ffo | 0        | 1        | 0        | 0        |
| LCE1C           | Q5T751        | -                                              | -   | -                                                | -                        | -    | -        | -        | -        | -        |
| WFIKKN2         | Q8TEU8        | -                                              | -   | -                                                | -                        | -    | -        | -        | -        | -        |
| ANGPTL4         | Q9BY76        | -                                              | -   | -                                                | -                        | -    | -        | -        | -        | -        |
| KLK5            | Q9Y337        | -                                              | -   | -                                                | -                        | -    | -        | -        | -        | -        |
| CYSRT1          | A8MQ03        | -                                              | -   | -                                                | -                        | -    | -        | -        | -        | -        |
| FCHO1           | O14526        | -                                              | -   | -                                                | -                        | -    | -        | -        | -        | -        |
| MCC             | P23508        | -                                              | -   | -                                                | -                        | -    | -        | -        | -        | -        |
| KRTAP10-8       | P60410        | -                                              | -   | -                                                | -                        | -    | -        | -        | -        | -        |
| KRTAP1-1        | Q07627        | -                                              | -   | -                                                | -                        | -    | -        | -        | -        | -        |
| LRRC32          | Q14392        | -                                              | -   | -                                                | -                        | -    | -        | -        | -        | -        |
| DIP2A           | Q14689        | -                                              | -   | -                                                | -                        | -    | -        | -        | -        | -        |
| PDGFRL          | Q15198        | -                                              | -   | -                                                | -                        | -    | -        | -        | -        | -        |
| GREB1           | Q4ZG55        | -                                              | -   | -                                                | -                        | -    | -        | -        | -        | -        |
| LCE1D           | Q5T752        | -                                              | -   | -                                                | -                        | -    | -        | -        | -        | -        |
| LCE1A           | Q5T7P2        | -                                              | -   | -                                                | -                        | -    | -        | -        | -        | -        |
| LCE3A           | Q5TA76        | -                                              | -   | -                                                | -                        | -    | -        | -        | -        | -        |
| LCE2C           | Q5TA81        | -                                              | -   | -                                                | -                        | -    | -        | -        | -        | -        |
| ADAMTSL4        | Q6UY14        | -                                              | -   | -                                                | -                        | -    | -        | -        | -        | -        |
| BLID            | Q8IZY5        | -                                              | -   | -                                                | -                        | -    | -        | -        | -        | -        |
| CATSPER1        | Q8NEC5        | -                                              | -   | -                                                | -                        | -    | -        | -        | -        | -        |
| SCGB3A1         | Q96QR1        | -                                              | -   | -                                                | -                        | -    | -        | -        | -        | -        |
| KRTAP4-11       | Q9BYQ6        | -                                              | -   | -                                                | -                        | -    | -        | -        | -        | -        |
| BCAS3           | Q9H6U6        | -                                              | -   | -                                                | -                        | -    | -        | -        | -        | -        |
| PSMC3IP         | Q9P2W1        | -                                              | -   | -                                                | -                        | -    | -        | -        | -        | -        |
| MLH3            | Q9UHC1        | -                                              | -   | -                                                | -                        | -    | -        | -        | -        | -        |
| LCE2B           | O14633        | -                                              | -   | -                                                | -                        | -    | -        | -        | -        | -        |
| <i>All PPIs</i> |               |                                                |     |                                                  |                          |      | <b>2</b> | <b>7</b> | <b>3</b> | <b>1</b> |
| <b>TSHR</b>     | <b>P16473</b> | 2xwt_C                                         | 31  | 0/100/100                                        | Monomer                  | N/A  |          |          |          |          |

|        |        |                            |    |                                   |         |   |   |   |   |   |
|--------|--------|----------------------------|----|-----------------------------------|---------|---|---|---|---|---|
| SCRIB  | Q14160 | 4wyt_A<br>1x5q_A<br>1wha_A | 12 | 100/100/100<br>/100/0/0/0/<br>100 | Monomer | - | - | - | - | - |
| RABAC1 | Q9UI14 | -                          | -  | -                                 | -       | - | - | - | - | - |

<sup>1</sup> Gene name and UniProt code for the proteins associated to diseases detected in newborn screening (first line, in bold) and for their interacting partners as provided by Interactome3D database (rest of lines).

<sup>2</sup> PDB codes and chain IDs corresponding to the available 3D structure of the individual proteins analyzed here and to their interacting partners (in parenthesis, the template of the homology model provided by Interactome3D, if no experimental structure is available).

<sup>3</sup> Global structural coverage: percentage of the sequence of each individual protein that has available 3D structure in the corresponding PDB files.

<sup>4</sup> Domain structural coverage: structural coverage (%) of each of the individual domains annotated for each individual protein.

<sup>5</sup> Oligomeric state for each individual protein as indicated in the biological unit in the PDB.

<sup>6</sup> PDB code of the structure of the complex formed by the individual proteins analyzed here with each interacting partner, as provided by Interactome3D. The first line corresponding to each individual protein analyzed here refers to the self-interactions (generated by the oligomeric state indicated in the biological unit).

<sup>7</sup> Mutated residues (involved in neutral or pathogenic mutations) that are located in each interface region as indicated by the complex structure. In the case of homo oligomers, a mutated residue could be counted in different regions if so appears in the different subunits.

<sup>8</sup> Global summary of the location of mutations in all the interactions for a given protein. Each mutated residue is counted only at one region.
