# Supplementary material for: Structural and Computational Characterization of Disease-Related Mutations Involved in Protein-Protein Interfaces
Source: MDPI journal article supplement (doi:10.3390/ijms20071583), 2019-03-29
Supplement: s1 [file s1]

**Table S1.** Proteins associated to diseases detected in newborn screening, with known pathological and neutral mutations

| Gene    | UniProt | Disease <sup>1</sup>                                  | Neutral mutations | Disease mutations |
|---------|---------|-------------------------------------------------------|-------------------|-------------------|
| ABCD4   | O14678  | Methylmalonic aciduria and homocystinuria (cblJ type) | 80                | 2                 |
| ACADM   | P11310  | Medium chain acyl CoA dehydrogenase deficiency        | 43                | 119               |
| ACADS   | P16219  | Small chain Acyl-CoA-dehydrogenase deficiency         | 51                | 66                |
| ACADSB  | P45954  | Ethylmalonic aciduria                                 |                   |                   |
| ACADVL  | P49748  | 2-Methylbutyryl-CoA dehydrogenase deficiency          | 34                | 10                |
|         |         | Very long chain acyl-CoA dehydrogenase deficiency     | 114               | 153               |
|         |         | Carnitine palmitoyltransferase 2 deficiency           |                   |                   |
| ACAT1   | P24752  | Acetoacetyl-CoA-thiolase deficiency                   | 22                | 41                |
|         |         | Alpha-methylacetoacetic aciduria                      |                   |                   |
|         |         | 3-ketothiolase deficiency                             |                   |                   |
| ACSF3   | Q4G176  | Malonic & methylmalonic aciduria                      | 47                | 15                |
|         |         | Methylmalonic acidemia                                |                   |                   |
| ARG1    | P05089  | Argininemia / Arginase I deficiency                   | 46                | 26                |
| ASL     | P04424  | Argininosuccinic aciduria                             | 120               | 111               |
|         |         | Argininosuccinate lyase deficiency                    |                   |                   |
| ASS1    | P00966  | Citrullinaemia                                        | 152               | 84                |
| BCKDHA  | P12694  | Maple syrup urine disease                             | 43                | 64                |
| BCKDHB  | P21953  | Maple syrup urine disease                             | 47                | 64                |
| BTD     | P43251  | Biotinidase deficiency                                | 65                | 180               |
| CBS     | P35520  | Homocystinuria                                        | 39                | 130               |
|         |         | Myelomeningocele                                      |                   |                   |
| CFTR    | P13569  | Cystic fibrosis                                       | 225               | 963               |
|         |         | Pancreatitis chronic                                  |                   |                   |
|         |         | Hypertrypsinaemia, neonatal                           |                   |                   |
|         |         | Asthma                                                |                   |                   |
|         |         | Chronic pulmonary disease                             |                   |                   |
|         |         | Congenital absence of vas deferens                    |                   |                   |
|         |         | Primary sclerosing colangitis                         |                   |                   |
|         |         | Bronchiectasis                                        |                   |                   |
| CPT1A   | P50416  | Carnitine palmitoyltransferase 1 deficiency           | 89                | 34                |
| CPT1B   | Q92523  | Carnitine palmitoyltransferase 1 deficiency           | 83                | 2                 |
|         |         | Autism spectrum disorder                              |                   |                   |
|         |         | Obesity                                               |                   |                   |
| CPT1C   | Q8TCG5  | Carnitine palmitoyltransferase 1 deficiency           | 56                | 1                 |
| CPT2    | P23786  | Carnitine palmitoyltransferase 2 deficiency           | 74                | 73                |
|         |         | Hypercholesterolaemia                                 |                   |                   |
|         |         | Muscular dystrophy, limb-girdle                       |                   |                   |
| CYP11B1 | P15538  | Congenital Adrenal hyperplasia                        | 64                | 88                |
| CYP17A1 | P05093  | Congenital Adrenal hyperplasia                        | 29                | 74                |
|         |         | Pseudohermaphroditism                                 |                   |                   |
| CYP21A2 | P08686  | Congenital Adrenal hyperplasia                        | 81                | 170               |
|         |         | Premature pubarche                                    |                   |                   |
| DBT     | P11182  | Maple syrup urine disease                             | 38                | 39                |
| ETFA    | P13804  | Glutaric acidemia type 2                              | 116               | 17                |
| ETFB    | P38117  | Glutaric acidemia type 2                              | 83                | 7                 |
| ETFDH   | Q16134  | Glutaric acidemia type 2                              | 128               | 130               |
|         |         | Acyl-CoA dehydrogenation deficiency                   |                   |                   |
|         |         | Coenzyme Q10 deficiency                               |                   |                   |
|         |         | Lipid storage myopathy                                |                   |                   |
|         |         | Subacute myopathy                                     |                   |                   |
| FAH     | P16930  | Tyrosinaemia type 1                                   | 39                | 57                |
| FCGR2A  | P12318  | Cystic fibrosis                                       | 14                | 3                 |
|         |         | Lupus nephritis                                       |                   |                   |
| GALT    | P07902  | Galactosaemia                                         | 33                | 249               |
| GCDH    | Q92947  | Glutaric acidemia type I                              | 78                | 162               |
| HADHA   | P40939  | Long-chain 3-hydroxyacyl-CoA dehydrogenase deficiency | 116               | 31                |
|         |         | Mitochondrial trifunctional protein deficiency        |                   |                   |
|         |         | Rhabdomyolysis                                        |                   |                   |
| HADHB   | P55084  | Mitochondrial trifunctional protein deficiency        | 70                | 35                |
|         |         | Charcot-Marie-Tooth disease                           |                   |                   |
|         |         | Hypoparathyroidism, infantile-onset                   |                   |                   |
|         |         | Peripheral polyneuropathy                             |                   |                   |
| HBB     | P68871  | Thalassaemia beta                                     | 31                | 389               |
|         |         | Sickle cell anaemia                                   |                   |                   |
|         |         | Erythrocytosis                                        |                   |                   |
|         |         | Dyspnea, progressive                                  |                   |                   |
| HCFC1   | P51610  | Methylmalonic acidemia with homocystinuria            | 215               | 14                |
|         |         | Dysmorphic features                                   |                   |                   |
|         |         | Hypospadias                                           |                   |                   |
|         |         | Intellectual disability (nonsyndromic/X-linked)       |                   |                   |

|          |        |                                                                                                                                                     |     |     |
|----------|--------|-----------------------------------------------------------------------------------------------------------------------------------------------------|-----|-----|
| HMGCL    | P35914 | Mental retardation (X-linked)<br>HMG-CoA lyase deficiency                                                                                           | 27  | 30  |
| HPD      | P32754 | 3-hydroxy-3-methylglutaric aciduria<br>Tyrosinaemia                                                                                                 | 34  | 8   |
| HSD3B2   | P26439 | Hawkinsinuria<br>Congenital adrenal hyperplasia                                                                                                     | 48  | 46  |
| IVD      | P26440 | Hypospadias / Idiopathic hypospadias<br>Pseudohermaphroditism                                                                                       | 73  | 50  |
| LMBRD1   | Q9NUN5 | Isovaleric acidemia<br>Complex I deficiency                                                                                                         | 202 | 0   |
| MCCC1    | Q96RQ3 | Methylmalonic aciduria and homocystinuria (cblF type)<br>3-methylcrotonyl-CoA carboxylase deficiency                                                | 63  | 60  |
| MCCC2    | Q9HCC0 | 3-methylcrotonyl-CoA carboxylase deficiency<br>Complex I deficiency                                                                                 | 36  | 85  |
| MLYCD    | O95822 | Malonyl-CoA decarboxylase deficiency                                                                                                                | 51  | 17  |
| MMAA     | Q8IVH4 | Methylmalonic acidemia/aciduria (cblA type)                                                                                                         | 49  | 31  |
| MMAB     | Q96EY8 | Methylmalonic acidemia (cblB type)                                                                                                                  | 8   | 21  |
| MMACHC   | Q9Y4U1 | Methylmalonic acidemia (cblC type)<br>Homocystinuria (cblC type)                                                                                    | 38  | 43  |
| MMADHC   | Q9H3L0 | Methylmalonic aciduria (cblD type)<br>Homocystinuria (cblD type)                                                                                    | 93  | 8   |
| MTHFR    | P42898 | Homocystinuria<br>Critical congenital Heart Disease<br>Neural tube defect<br>Preeclampsia<br>Inborn errors of metabolism<br>Cleft lip and/or palate | 51  | 94  |
| MUT      | P22033 | Methylmalonic acidemia                                                                                                                              | 224 | 224 |
| PAH      | P00439 | Classic phenylketonuria<br>Benign hyperphenylalaninaemia                                                                                            | 86  | 582 |
| PAX8     | Q06710 | Primary congenital hypothyroidism                                                                                                                   | 136 | 27  |
| PCCA     | P05165 | Propionic acidemia                                                                                                                                  | 101 | 51  |
| PCCB     | P05166 | Propionic acidemia                                                                                                                                  | 217 | 63  |
| SLC22A5  | O76082 | Carnitine deficiency                                                                                                                                | 70  | 79  |
| SLC25A13 | Q9UJS0 | Citrullinemia, type 2                                                                                                                               | 355 | 64  |
| SLC25A20 | O43772 | Carnitine-acylcarnitine translocase deficiency                                                                                                      | 87  | 19  |
| TAT      | P17735 | Tyrosinaemia type 2                                                                                                                                 | 50  | 15  |
| TGFB1    | P01137 | Cystic fibrosis<br>Osteoporosis / Osteosclerosis<br>Camurati-Engelmann<br>Cleft-lip                                                                 | 65  | 16  |
| TSHR     | P16473 | Primary congenital hypothyroidism                                                                                                                   | 73  | 107 |

<sup>1</sup> Disease detected in newborn screening (first line) and other associated diseases.
